# Supplementary material
Source: PubMed Central journal article supplement (PMC5813742)
Supplement: supp_the2017-0199_onco12285-sup-0001-suppinfo01.pdf [file supp_the2017-0199_onco12285-sup-0001-suppinfo01.pdf]

Supplemental Appendix for:  
Rare Tumor Clinic: The UCSD Moores Cancer Center Experience with a Precision Therapy Approach  
Shumei Kato et al.

**Table S1.** Clinical characteristics, genomics and protein analyses among patients presented at Rare Tumor Clinic (N=40).

| ID | Age/<br>Gender | Cancer Diagnosis                       | Rare/Ultra-<br>Rare | Tissue Next Generation Sequencing<br>*                                                             | Protein analyses <sup>§</sup>                                                                           | ctDNA <sup>†</sup> |
|----|----------------|----------------------------------------|---------------------|----------------------------------------------------------------------------------------------------|---------------------------------------------------------------------------------------------------------|--------------------|
| 1  | 69/W           | Ampullary<br>Carcinoma                 | Ultra-rare          | APC G1499*<br>APC S1400*<br>CDK6 amplification<br>ERBB2 amplification<br>ERBB2 T733I<br>TP53 C135G |                                                                                                         |                    |
| 2  | 76/M           | Ameloblastoma                          | Ultra-rare          | FGFR2 Y375C<br>MLL2 E1675*<br>MLL2 E4957*<br>SETD2 G1659V<br>SMO L412F                             | EGFR (+)<br>ERCC1 (-)<br>PGP (-)<br>RRM1 (-)<br>TLE3 (+)<br>TOPO1 (+)<br>TS (-)                         | None detected.     |
| 3  | 61/W           | Anal Squamous<br>Cell Carcinoma        | Ultra-rare          | FAT1 K2138*<br>PIK3CA K111N<br>STK11 126fs*20                                                      | <b>Pathline:</b><br>PD-L1 (+)<br>EGFR (+)<br>PGP (-)<br>TLE3 (+)<br>TOP2A (+)<br>TOPO1 (+)<br>TUBB3 (-) | ATM R3008C         |
| 4  | 58/M           | Basal Cell<br>Carcinoma,<br>metastatic | Rare                | <b>Sample #1:</b><br>CDKN1A R140Q<br>CDKN2A p16INK4a P81L                                          | <b>Sample #1:</b><br>MGMT (-)<br>RRM1 (-)                                                               | TP53 P278S         |

Supplemental Appendix for:  
 Rare Tumor Clinic: The UCSD Moores Cancer Center Experience with a Precision Therapy Approach  
 Shumei Kato et al.

|                                            |                   |
|--------------------------------------------|-------------------|
| <i>CTNNA1</i> R383H                        | TOPO1 (+)         |
| <i>LRP1B</i> splice site variant 9121-1G>A | TUBB3 (-)         |
| <i>NOTCH1</i> W287*                        |                   |
| <i>PTCH1</i> Q1366*                        | <b>Sample #2:</b> |
| <i>PTCH1</i> W197*                         | TOP2A (+)         |
| <i>SLIT2</i> K325*                         | TOPO1 (+)         |
| <i>SMARCA4</i> Q1166*                      | TS (-)            |
| <i>TP53</i> P278S                          |                   |

**Sample #2:**  
*CD274 (PD-L1)* amplification  
*CDKN1A* R140Q  
*CDKN2A p16INK4a* P81L  
*CTNNA1* R383H  
*FLT1* E487K  
*JAK2* amplification  
*LRP1B* W2334\*  
*LRP1B* splice site 9121-1G>A  
*MLL2* splice site 4132-1G>A *NOTCH1* W287\*  
*PDCD1LG2 (PD-L2)* amplification  
*PDGFRA* E459K  
*PIK3R2* Q412\*  
*PTCH1* Q1366\*  
*PTCH1* W197\*  
*SLIT2* K325\*  
*SMARCA4* Q1166\*  
*TERT* promoter-139\_-138CC>TT  
*TP53* P278S

Supplemental Appendix for:  
Rare Tumor Clinic: The UCSD Moores Cancer Center Experience with a Precision Therapy Approach  
Shumei Kato et al.

Microsatellite instability: Stable  
Tumor mutation burden: High, 104  
mutations per megabase

|   |      |                            |            |                                                                                                                                                                                                                                                                                                                    |                                                                                                                                                                                    |                |
|---|------|----------------------------|------------|--------------------------------------------------------------------------------------------------------------------------------------------------------------------------------------------------------------------------------------------------------------------------------------------------------------------|------------------------------------------------------------------------------------------------------------------------------------------------------------------------------------|----------------|
| 5 | 42/M | Castleman's Disease        | Ultra-rare | Insufficient sample.                                                                                                                                                                                                                                                                                               |                                                                                                                                                                                    | None detected. |
| 6 | 52/W | Castleman's Disease        | Ultra-rare | <i>JAK1</i> V310I                                                                                                                                                                                                                                                                                                  |                                                                                                                                                                                    |                |
| 7 | 68/W | Castleman's Disease        | Ultra-rare |                                                                                                                                                                                                                                                                                                                    |                                                                                                                                                                                    | None detected. |
| 8 | 36/W | Desmoid Tumor              | Ultra-rare | <i>CTNGB1</i> S45N                                                                                                                                                                                                                                                                                                 | ERCC1 (-)<br>MGMT (-)<br>PGP (-)<br>PTEN (-)<br>TS (-)                                                                                                                             | None detected. |
| 9 | 66/W | Endometrial Stroma Sarcoma | Ultra-rare | <b>Sample #1:</b><br><i>ZC3H7B-BCOR</i> fusion<br><i>CDKN2A p14ARF</i> P72L<br><i>CDKN2A p16INK4A</i> R58*<br><br><b>Sample #2:</b><br><i>CDKN2A p14ARF</i> P72L<br><i>CDKN2A p16INK4a</i> R58*<br><i>FRS2</i> amplification<br><i>MDM2</i> amplification<br><br><b>NantOmics:</b><br><i>PIK3C2G</i> amplification | <b>Sample #1:</b><br>EGFR (+)<br>ERCC1 (-)<br>MGMT (-)<br>RRM1 (-)<br>TLE3 (+)<br>TOP2A (+)<br>TUBB3 (-)<br><br><b>Sample #2:</b><br>EGFR (+)<br>ERCC1 (-)<br>MGMT (-)<br>RRM1 (-) | None detected. |

Supplemental Appendix for:  
Rare Tumor Clinic: The UCSD Moores Cancer Center Experience with a Precision Therapy Approach  
Shumei Kato et al.

|    |      |                                      |            |                                                                                                                                                                                                                                                    | TLE3 (+)<br>TOP2A (+)<br>TUBB3 (-)<br>PR (+)                                                                                          |                   |
|----|------|--------------------------------------|------------|----------------------------------------------------------------------------------------------------------------------------------------------------------------------------------------------------------------------------------------------------|---------------------------------------------------------------------------------------------------------------------------------------|-------------------|
| 10 | 51/W | Erdheim Chester Disease <sup>¥</sup> | Ultra-rare |                                                                                                                                                                                                                                                    |                                                                                                                                       | None detected.    |
| 11 | 53/M | Erdheim Chester Disease <sup>¥</sup> | Ultra-rare |                                                                                                                                                                                                                                                    |                                                                                                                                       | None detected.    |
| 12 | 54/M | Erdheim Chester Disease              | Ultra-rare | <i>ASXL1</i> R693*<br><i>BRAF</i> V600E<br><i>U2AF1</i> Q157P                                                                                                                                                                                      |                                                                                                                                       | <i>JAK2</i> V617F |
| 13 | 57/M | Erdheim Chester Disease <sup>¥</sup> | Ultra-rare | <b>UCSD NGS:</b><br>None detected.                                                                                                                                                                                                                 | MGMT (-)<br>TOPO1 (+)<br>TS (-)<br>TUBB3 (-)                                                                                          | None detected.    |
| 14 | 67/W | Erdheim Chester Disease              | Ultra-rare | Insufficient sample.                                                                                                                                                                                                                               | <b>Emerge:</b><br>PD-L1 (+)                                                                                                           | None detected.    |
| 15 | 87/W | Merkel Cell Carcinoma                | Ultra-rare | <i>ARID1A</i> splice site 4004+1G>A<br><i>ATR</i> W1883*<br><i>BCOR</i> rearrangement intron 6<br><i>BRCA1</i> inversion exon 4<br><i>DICER1</i> S1344L<br><i>FAM123B</i> G303D<br><i>MUTYH</i> G382D<br><i>RB1</i> Q597*<br><i>TP53</i> L194fs*14 | <b>Pathline:</b><br>PD-L1 (+)<br>ERCC1 (-)<br>PGP (-)<br>PTEN (-)<br>RRM1 (-)<br>TOPO1 (+)<br>TS (-)<br>TUBB3 (-)<br><b>Pathline:</b> |                   |

Supplemental Appendix for:  
Rare Tumor Clinic: The UCSD Moores Cancer Center Experience with a Precision Therapy Approach  
Shumei Kato et al.

|    |      |                                                              |            | TP53 V147I<br>TP53 W146*                                                                                                                                                                                                                                                                                                                                                                                  | PD-L1 (+)                                                              |                                                                                      |
|----|------|--------------------------------------------------------------|------------|-----------------------------------------------------------------------------------------------------------------------------------------------------------------------------------------------------------------------------------------------------------------------------------------------------------------------------------------------------------------------------------------------------------|------------------------------------------------------------------------|--------------------------------------------------------------------------------------|
| 16 | 49/W | Neuroendocrine tumor of the uterine (high-grade, large cell) | Ultra-rare | ABL2 P497fs*7<br>ATRX D1940fs*15<br>BLM N515fs*16<br>FBXW7 R465H<br>FGF6 V127M<br>JAK1 K860fs*16<br>JAK1 P430fs*2<br>MEN1 R521fs*7<br>MLL2 P2302fs*20<br>MLL3 K2797fs*26<br>MSH2 E48*<br>MSH2 Q324*<br>NOTCH1 R1586H<br>PIK3CA E545D<br>PREX2 S565fs*3<br>PTEN K267fs*9<br>PTEN R130Q<br>QKI A338T<br>SETD2 F636fs*6<br>SMARCA4 Q214*<br>SMARCA4 T296fs*7<br>STK11 W332*<br>TET2 R1440fs*38<br>TET2 R550* | ERCC1 (-)<br>MSH2 (-)<br>MSH6 (-)<br>PGP (-)<br>TOP2A (+)<br>TOPO1 (+) | PTEN R130Q<br>FBXW7 R465H<br>PIK3CA E545D<br>PIK3CA R88Q<br>NRAS Q61R<br>CTNNB1 S33A |
|    |      |                                                              |            | Microsatellite instability: High<br>Tumor mutation burden: High, 54 mutations per megabase                                                                                                                                                                                                                                                                                                                |                                                                        |                                                                                      |

Supplemental Appendix for:  
Rare Tumor Clinic: The UCSD Moores Cancer Center Experience with a Precision Therapy Approach  
Shumei Kato et al.

|    |      |                             |            |                                                                                                        |                                                                                                                                                                                             |                                                                                                                                                                                                                                                            |
|----|------|-----------------------------|------------|--------------------------------------------------------------------------------------------------------|---------------------------------------------------------------------------------------------------------------------------------------------------------------------------------------------|------------------------------------------------------------------------------------------------------------------------------------------------------------------------------------------------------------------------------------------------------------|
| 17 | 62/W | Yolk Sac Tumor of the Liver | Ultra-rare | <i>AKT2</i> amplification<br><i>CCNE1</i> amplification<br><i>TP53</i> D281E                           |                                                                                                                                                                                             | <b>Sample #1:</b><br><i>CCNE1</i> amplification<br><i>CDK6</i> amplification<br><i>EGFR</i> amplification<br><i>MYC</i> amplification<br><i>PIK3CA</i> amplification<br><br><b>Sample #2:</b><br>None detected.<br><br><b>Sample #3:</b><br>None detected. |
| 18 | 55/M | Thymoma, type B3            | Ultra-rare | <i>DNMT3A</i> R882H                                                                                    | PD-L1 (+)<br>TS (-)<br>TUBB3 (-)<br><br><b>Pathline:</b><br>PD-L1 (+)<br>ER (+)<br>RRM1 (-)<br>TOPO1 (+)<br>TS (-)<br><br><b>Clariant:</b><br>EGFR (+)<br><br><b>Pathline:</b><br>PD-L1 (+) | None detected.                                                                                                                                                                                                                                             |
| 19 | 54/W | Fallopian Cancer            | Ultra-rare | <i>FANCC</i> truncation exon 8<br><i>MYC</i> amplification<br><i>NF1</i> S821fs*5<br><i>TP53</i> S166* | ER (+)<br>RRM1 (-)<br>TOPO1 (+)<br>TS (-)<br><br><b>Clariant:</b><br>EGFR (+)<br><br><b>Pathline:</b><br>PD-L1 (+)                                                                          | <i>BRAF</i> amplification<br><i>MET</i> amplification<br><i>MYC</i> amplification<br><i>PIK3CA</i> amplification<br><i>TP53</i> S166*<br><i>TP53</i> V147G                                                                                                 |
| 20 | 73/M | Myxofibrosarcoma            | Ultra-rare | <i>FRS2</i> amplification<br><i>IGF1R</i> amplification                                                | Only PD-L1 testing was done which was                                                                                                                                                       | None detected.                                                                                                                                                                                                                                             |

Supplemental Appendix for:  
Rare Tumor Clinic: The UCSD Moores Cancer Center Experience with a Precision Therapy Approach  
Shumei Kato et al.

*MDM2* amplification negative.  
*PIK3R2* M476I

Microsatellite instability: Stable  
Tumor mutation burden: Low,  $\leq 1$   
mutation per megabase

**NantOmics:**

*BRCA2* K3326  
*IGF1R* 17X amplification

|    |      |                                                                 |      |                                                                                                                                                                                                                                                                                                                                                                                      |                                                                                                                                             |                  |
|----|------|-----------------------------------------------------------------|------|--------------------------------------------------------------------------------------------------------------------------------------------------------------------------------------------------------------------------------------------------------------------------------------------------------------------------------------------------------------------------------------|---------------------------------------------------------------------------------------------------------------------------------------------|------------------|
| 21 | 62/M | Basal Cell Carcinoma, locally advanced, surgically unresectable | Rare | <i>ASXL1</i> Q760*<br><i>INPP4B</i> W521*<br><i>KEL</i> R130Q<br><i>PIK3R1</i> R534*<br><i>PTCH1</i> splice site 1504-1G>T<br><i>PTEN</i> splice site 210 2A>T<br><i>RAC1</i> P29S<br><i>TERT</i> promotor- 124C>T<br><i>TP53</i> Q100*<br><i>TP53</i> R196*<br><i>WT1</i> C350R<br><br>Microsatellite instability: Stable<br>Tumor mutation burden: High, 53 mutations per megabase | AR (+)<br>EGFR (+)<br>ERCC1 (-)<br>MGMT (-)<br>PGP (-)<br>PTEN (-)<br>RRM1 (-)<br>TLE3 (+)<br>TOP2A (+)<br>TOPO1 (+)<br>TS (-)<br>TUBB3 (-) | None detected.   |
| 22 | 37/W | Papillary serous carcinoma of ovary                             | Rare | <i>KRAS</i> G12V<br><br>Microsatellite instability: Unknown<br>Tumor mutation burden: Low, 5 mutations per megabase                                                                                                                                                                                                                                                                  | <b>Sample #1:</b><br>ER (+)<br>MGMT (-)<br>PGP (-)<br>RRM1 (-)                                                                              | <i>KRAS</i> G12V |

Supplemental Appendix for:  
 Rare Tumor Clinic: The UCSD Moores Cancer Center Experience with a Precision Therapy Approach  
 Shumei Kato et al.

TOP2A (+)  
 TS (-)  
 TUBB3 (-)

**Sample #2:**

ER (+)  
 ERCC1 (-)  
 RRM1 (-)  
 TS (-)  
 TUBB3 (-)

|    |      |                                  |      |                                                                                      |                                                                   |                                                                                                                                                                                                                                                                                                                                                                                                        |
|----|------|----------------------------------|------|--------------------------------------------------------------------------------------|-------------------------------------------------------------------|--------------------------------------------------------------------------------------------------------------------------------------------------------------------------------------------------------------------------------------------------------------------------------------------------------------------------------------------------------------------------------------------------------|
| 23 | 68/W | High-grade serous ovarian Cancer | Rare | <i>FANCC</i> N152fs*9<br><i>TP53</i> V173M<br><br>Microsatellite instability: Stable | EGFR (+)<br>ER (+)<br>RRM1 (-)<br>TLE3 (+)<br>TS (-)<br>TUBB3 (-) | <i>BRAF</i> amplification<br><i>CCND2</i> amplification<br><i>CCNE1</i> amplification<br><i>CDK4</i> amplification<br><i>CDK6</i> amplification<br><i>EGFR</i> amplification<br><i>ERBB2</i> amplification<br><i>FGFR2</i> amplification<br><i>KRAS</i> amplification<br><i>MET</i> amplification<br><i>MYC</i> amplification<br><i>PIK3CA</i> amplification<br><i>TP53</i> V173M<br><i>TP53</i> R273H |
| 24 | 51/M | Adenoid Cystic Carcinoma         | Rare | <b>Washington University NGS:</b><br><i>AKT1</i> L52R                                |                                                                   | None detected.                                                                                                                                                                                                                                                                                                                                                                                         |
| 25 | 62/W | Papillary serous carcinoma of    | Rare | <i>AURKA</i> amplification<br><i>GNAS</i> amplification                              | ER (+)<br>RRM1 (-)                                                | <i>ATM</i> R3008H<br><i>TP53</i> Y236D                                                                                                                                                                                                                                                                                                                                                                 |

Supplemental Appendix for:  
Rare Tumor Clinic: The UCSD Moores Cancer Center Experience with a Precision Therapy Approach  
Shumei Kato et al.

|       |      |                                                 |            |                                                                                                                                                                                                                                           |                                                            |                |
|-------|------|-------------------------------------------------|------------|-------------------------------------------------------------------------------------------------------------------------------------------------------------------------------------------------------------------------------------------|------------------------------------------------------------|----------------|
| ovary |      |                                                 |            | <i>LYN</i> amplification<br><i>PRKCI</i> amplification<br><i>TERC</i> amplification<br><i>TP53</i> R273H<br><i>ZNF217</i> amplification<br><br>Microsatellite instability: Stable<br>Tumor mutation burden: Low, 5 mutations per megabase | TLE3 (+)<br>TOP2A (+)<br>TOPO1 (+)<br>TS (-)               |                |
| 26    | 71/W | High-grade serous fallopian tube adenocarcinoma | Ultra-rare | <i>KRAS</i> amplification<br><i>TP53</i> P250_I251del<br><i>CCNE1</i> amplification                                                                                                                                                       | ERCC1 (-)<br>TLE3 (+)<br>TOP2A (+)<br>RRM1 (-)             | None detected. |
| 27    | 63/W | Liposarcoma                                     | Ultra-rare | <i>AKT1</i> amplification<br><i>CDK4</i> amplification<br><i>MDM2</i> amplification<br><i>CDC73</i> rearrangement intron 14<br><i>FRS2</i> amplification<br><i>ZRSR2</i> R446_R448>R                                                      | ERCC1 (-)<br>MGMT (-)<br>RRM1 (-)<br>TS (-)                | TP53 L130V     |
| 28    | 31/W | Castleman's Disease                             | Ultra-rare | Insufficient tissue.                                                                                                                                                                                                                      | Only PD-L1 testing was done which was negative.            | None detected. |
| 29    | 66/W | Metaplastic carcinoma of breast                 | Ultra-rare | <i>EGFR</i> F795C<br><i>HRAS</i> G13R<br><i>CDKN2A/B</i> loss<br><i>PIK3R1</i> K567_L570del<br><i>TP53</i> R282W                                                                                                                          | EGFR (+)<br>ERCC1 (-)<br>MGMT (-)<br>TLE3 (+)<br>TOPO1 (+) | None detected. |

Supplemental Appendix for:  
Rare Tumor Clinic: The UCSD Moores Cancer Center Experience with a Precision Therapy Approach  
Shumei Kato et al.

|    |      |                 |            |                                                                                                                                                                                                                                                       |                                                                                       |                                                                                                                                                                                                                                                                                                            |
|----|------|-----------------|------------|-------------------------------------------------------------------------------------------------------------------------------------------------------------------------------------------------------------------------------------------------------|---------------------------------------------------------------------------------------|------------------------------------------------------------------------------------------------------------------------------------------------------------------------------------------------------------------------------------------------------------------------------------------------------------|
|    |      |                 |            |                                                                                                                                                                                                                                                       | TOP2A (+)<br>PD-L1: (+)                                                               |                                                                                                                                                                                                                                                                                                            |
| 30 | 70/M | Chondrosarcoma  | Ultra-rare | <i>CDKN2A/B</i> loss exon 2<br><i>SETD2</i> splice site 4455-2_4456delAGAA                                                                                                                                                                            | PR (+)<br>RRM1 (-)<br>TLE3 (+)<br>TOPO1 (+)                                           | <i>TP53</i> V272M                                                                                                                                                                                                                                                                                          |
| 31 | 58/M | Ocular melanoma | Ultra-rare | <i>GNAQ</i> Q209L<br><i>SF3B1</i> R625C                                                                                                                                                                                                               | ERCC1 (-)<br>PD-L1 (+)<br>RRM1 (-)<br>TLE3 (+)<br>TOP2A (+)<br>TOPO1 (+)<br>TUBB3 (-) | <b>Sample #1:</b><br><i>MYC</i> amplification<br><i>BRAF</i> amplification<br><i>MET</i> amplification<br><i>ERBB2</i> amplification<br><br><b>Sample #2:</b><br><i>GNAQ</i> Q209L 9.6%<br><i>MYC</i> amplification<br><i>BRAF</i> amplification<br><i>MET</i> amplification<br><i>ERBB2</i> amplification |
| 32 | 55/W | Glioblastoma    | Rare       | <i>CDKN2A/B</i> loss<br><i>EGFR</i> amplification, G598V<br><i>PIK3R1</i> I571fs*31<br><i>TERT</i> promoter -124C>T<br><br><b>UCSD NGS:</b><br><i>CDKN2A/B</i> homozygous deletion<br><i>EGFR</i> G598V<br><i>NF2</i> L54Q<br><i>PIK3R1</i> I571fs*31 | ERCC1 (-)<br>RRM1 (-)<br>TLE3 (+)<br>TS (-)<br>TUBB3 (+)                              |                                                                                                                                                                                                                                                                                                            |

Supplemental Appendix for:  
Rare Tumor Clinic: The UCSD Moores Cancer Center Experience with a Precision Therapy Approach  
Shumei Kato et al.

|    |      |                                  |            |                                                               |                                                                                  |                                                                                                                                               |
|----|------|----------------------------------|------------|---------------------------------------------------------------|----------------------------------------------------------------------------------|-----------------------------------------------------------------------------------------------------------------------------------------------|
| 33 | 68/W | High grade serous ovarian cancer | Rare       | <i>RB1</i> V554L<br><i>TP53</i> M160_A161 ins AIYK, Q166*     | ER (+)<br>ERCC1 (-)<br>RRM1 (-)<br>TOPO1 (+)<br>TOP2A (+)<br>TS (-)<br>TUBB3 (-) | <i>BRAF</i> amplification<br><i>CCNE1</i> amplification<br><i>CDK6</i> amplification<br><i>EGFR</i> amplification<br><i>MET</i> amplification |
| 34 | 39/W | Myoepithelial carcinoma          | Ultra-rare | <i>EWSR1-NFATC2</i> fusion                                    | ERCC1 (-)<br>TLE3 (+)<br>TOPO1 (+)<br>TUBB3 (-)                                  | None detected.                                                                                                                                |
| 35 | 59/W | High grade serous ovarian cancer | Rare       | <i>BRCA1</i> K519fs*13<br><i>TP53</i> H179R                   | AR (+)<br>ER (+)<br>ERCC1 (-)<br>RRM1 (-)<br>TOPO1 (+)<br>TS (-)<br>TUBB3 (-)    | <i>BRAF</i> amplification<br><i>TP53</i> H179R<br><i>TP53</i> K132N                                                                           |
| 36 | 36/W | Angiosarcoma of breast           | Ultra-rare |                                                               | ERCC (-)<br>RRM1 (-)<br>TOP2A (+)                                                |                                                                                                                                               |
| 37 | 39/W | Fibromyxoid sarcoma              | Ultra-rare | <i>CRKL</i> amplification<br><i>EWSR1-CREB3L2</i> fusion      |                                                                                  | None detected.                                                                                                                                |
| 38 | 48/W | Poorly differentiated            | Rare       | <i>APC</i> 1309fs*4, splice site 730-1G>A<br><i>KRAS</i> G12V |                                                                                  |                                                                                                                                               |

Supplemental Appendix for:  
Rare Tumor Clinic: The UCSD Moores Cancer Center Experience with a Precision Therapy Approach  
Shumei Kato et al.

|    |      |                                                                 |            |                                                                                                                                                                                                                                                                                                                                                                                                                            |                                                 |                                                                                                                    |
|----|------|-----------------------------------------------------------------|------------|----------------------------------------------------------------------------------------------------------------------------------------------------------------------------------------------------------------------------------------------------------------------------------------------------------------------------------------------------------------------------------------------------------------------------|-------------------------------------------------|--------------------------------------------------------------------------------------------------------------------|
|    |      | carcinoma of<br>unknown primary                                 |            | <i>MTOR</i> S2215Y<br><i>RB</i> R661W<br><i>TP53</i> R175H                                                                                                                                                                                                                                                                                                                                                                 |                                                 |                                                                                                                    |
| 39 | 50/W | Metaplastic breast<br>cancer                                    | Ultra-rare | <i>ARID1A</i> Q1334_R1335insQ<br><i>CDKN2A/B</i> loss<br><i>FBXW7</i> R479G<br><i>FRS2</i> amplification<br><i>MDM2</i> amplification<br><i>PIK3CA</i> E545K<br><i>TP53</i> splice site 1101-<br>88_1158del146                                                                                                                                                                                                             | <b>Emerge:</b><br>PD-L1 (+)                     |                                                                                                                    |
| 40 | 70/W | High-grade<br>neuroendocrine<br>carcinoma of<br>unknown primary | Ultra-rare | <i>CDK4</i> R24L<br><i>FAT1</i> T1721fs*8<br><i>KRAS</i> G12C<br><i>PTEN</i> K163*<br><i>MYC</i> amplification – equivocal<br><i>RB1</i> splice site 1499-2A>T<br><i>RBM10</i> E513*<br><i>SMAD2</i> splice site 1136-<br>1_1136GG>TT<br><i>TERC</i> amplification – equivocal<br><i>TP53</i> I251fs*94<br><br>Microsatellite instability: Stable.<br>Tumor mutation burden:<br>Intermediate, 12 mutations per<br>megabase | ERCC1 (-)<br>MGMT (-)<br>TOP2A (+)<br>TOPO1 (+) | <i>BRAF</i> amplification<br><i>CDK4</i> R24L<br><i>KRAS</i> G12C<br><i>MYC</i> amplification<br><i>PTEN</i> K163* |

\* Unless specified, tissue next generation sequencing was done through Foundation Medicine (<http://www.foundationmedicine.com/>).  
Microsatellite instability and/or tumor mutation burden status were available in N=7 patients.

Supplemental Appendix for:  
Rare Tumor Clinic: The UCSD Moores Cancer Center Experience with a Precision Therapy Approach  
Shumei Kato et al.

<sup>§</sup> Unless specified, protein analyses were done through Caris (<http://www.carislifesciences.com/>). Only pertinent positive or negative actionable results are listed.

<sup>†</sup> ctDNA was done through Guardant Health (<http://www.guardanthealth.com/guardant360/>).

<sup>¥</sup> *BRAF* V600E mutation detected by polymerase chain reaction (N=3).

Blank = Not tested.

Abbreviation: NGS, next-generation sequencing.

Supplemental Appendix for:  
Rare Tumor Clinic: The UCSD Moores Cancer Center Experience with a Precision Therapy Approach  
Shumei Kato et al.

**Table S2.** Number and percentage of patients with pertinent protein abnormalities detected by IHC (n=29).

| Pertinent protein abnormalities | Results of IHC considered actionable | Condition for positive IHC results *                                                   | Number of patients with affected protein/Patients tested N (%) | Implications of protein markers                                                                                                       |
|---------------------------------|--------------------------------------|----------------------------------------------------------------------------------------|----------------------------------------------------------------|---------------------------------------------------------------------------------------------------------------------------------------|
| <b>RRM1</b>                     | Negative                             | Intensity $\geq 2+$ and $\geq 50\%$ of cells stained                                   | 17/21 (81.0%)                                                  | Low or loss of RRM1 (ribonucleotide reductase catalytic subunit M1) is potentially targetable with gemcitabine [S1].                  |
| <b>ERCC1</b>                    | Negative                             | Intensity of $\geq 3+$ with $\geq 10\%$ or $\geq 2+$ with $\geq 50\%$ of cells stained | 17/24 (70.8%)                                                  | Loss of ERCC1 (excision repair cross-complementation group 1) is potential marker for response to platinum [S2].                      |
| <b>TLE3</b>                     | Positive                             | Intensity $\geq 2+$ and $\geq 30\%$ of cells stained                                   | 12/17 (70.6%)                                                  | Positive TLE3 (transducin like enhancer of split 3) is potential marker for response to taxane therapy [S3].                          |
| <b>TOPO1</b>                    | Positive                             | Intensity $\geq 2+$ and $\geq 30\%$ of cells stained                                   | 16/24 (66.7%)                                                  | Positive TOPO1 (topoisomerase I) is potential marker for response to topoisomerase I inhibitors such as irinotecan or topotecan [S4]. |
| <b>PGP</b>                      | Negative                             | Intensity $\geq 1+$ and $\geq 10\%$ of cells stained                                   | 7/11 (63.6%)                                                   | Negative PGP (P-glycoprotein) may predict response to taxane [S5].                                                                    |
| <b>TS</b>                       | Negative                             | Intensity $\geq 1+$ and $\geq 10\%$ of cells stained                                   | 15/25 (60.0%)                                                  | Negative TS (thymidylate synthase) is potentially                                                                                     |

Supplemental Appendix for:  
Rare Tumor Clinic: The UCSD Moores Cancer Center Experience with a Precision Therapy Approach  
Shumei Kato et al.

|              |          |                                                      |               |                                                                                                                                                       |
|--------------|----------|------------------------------------------------------|---------------|-------------------------------------------------------------------------------------------------------------------------------------------------------|
| <b>TUBB3</b> | Negative | Intensity $\geq 2+$ and $\geq 30\%$ of cells stained |               | targetable with 5-fluorouracil [S6].                                                                                                                  |
|              |          |                                                      | 14/24 (58.3%) | Negative TUBB3 (class III beta-tubulin) is predictive marker for response with taxane-based therapy [S7].                                             |
| <b>EGFR</b>  | Positive | Intensity $\geq 1+$ and $\geq 10\%$ of cells stained |               | Although there are conflicting data, EGFR (epidermal growth factor receptor) is potentially targetable with anti-EGFR therapy such as cetuximab [S8]. |
|              |          |                                                      | 7/13 (53.8%)  |                                                                                                                                                       |
| <b>TOP2A</b> | Positive | Intensity $\geq 1+$ and $\geq 10\%$ of cells stained |               | Positive TOP2A (topoisomerase II alpha) predicts the response to topoisomerase II inhibitor such as doxorubicin [S9].                                 |
|              |          |                                                      | 13/25 (52.0%) |                                                                                                                                                       |
| <b>MGMT</b>  | Negative | Intensity $\geq 1+$ and $>35\%$ of cells stained     |               | Negative MGMT (O(6)-methylguanine-DNA methyltransferase) may predict response to alkylating agents such as dacarbazine [S10].                         |
|              |          |                                                      | 9/23 (39.1%)  |                                                                                                                                                       |
| <b>ER</b>    | Positive | Intensity $\geq 1+$ and $\geq 10\%$ of cells stained |               | Positive ER (estrogen receptor) predicts response to hormone modulator [S11].                                                                         |
|              |          |                                                      | 6/24 (25.0%)  |                                                                                                                                                       |
| <b>PD-L1</b> | Positive | Intensity $\geq 2+$ and $\geq 5\%$ of cells stained  |               | Positive PD-L1 (programmed death-ligand 1) predicts response to immune check point inhibitors [S12].                                                  |
|              |          |                                                      | 7/28 (25.0%)  |                                                                                                                                                       |
| <b>PTEN</b>  | Negative | Intensity $\geq 1+$ and $>50\%$                      | 3/25 (12.0%)  | PTEN (phosphatase and tensin                                                                                                                          |

Supplemental Appendix for:  
Rare Tumor Clinic: The UCSD Moores Cancer Center Experience with a Precision Therapy Approach  
Shumei Kato et al.

|             |          | of cells stained                                     |              | homolog) loss is potentially targetable with mTOR inhibitors [S13].                                                                             |
|-------------|----------|------------------------------------------------------|--------------|-------------------------------------------------------------------------------------------------------------------------------------------------|
| <b>PR</b>   | Positive | Intensity $\geq 1+$ and $\geq 10\%$ of cells stained | 2/20 (10.0%) | Positive PR (progesterone receptor) predicts response to hormone modulator [S14]                                                                |
| <b>AR</b>   | Positive | Intensity $\geq 1+$ and $\geq 10\%$ of cells stained | 2/24 (8.3%)  | Positive AR (androgen receptor) predicts response to hormone modulator [S11].[S15]                                                              |
| <b>MSH2</b> | Negative | Intensity $\geq 1+$ and $\geq 1\%$ of cells stained  | 1/20 (5.0%)  | Loss of mismatch repair protein (e.g. MSH2 [MutS protein homolog 2] or MSH6 [MutS protein homolog 6]) predicts response to PD-1 blockade [S16]. |
| <b>MSH6</b> | Negative | Intensity $\geq 1+$ and $\geq 1\%$ of cells stained  | 1/20 (5.0%)  |                                                                                                                                                 |

Only pertinent positive and negative results were listed. For example, positive, AR, EGFR, ER, PD-L1, PR, TLE3, TOP2A, and TOPO1 as well as negative ERCC1, MGMT, MLH1, MSH2, MSH6, PGP, PTEN, RRM1, TS, and TUBB3 were considered pertinent since they are targetable.

\* Condition for positive IHC results according to Caris Life Sciences ([www.carismolecularintelligence.com](http://www.carismolecularintelligence.com)).

#### Abbreviations:

AR, androgen receptor; EGFR, epidermal growth factor receptor; ER, estrogen receptor; ERCC1, excision repair cross-complementation group 1; MGMT, O(6)-methylguanine-DNA methyltransferase; MSH2, MutS protein homolog 2; MSH6, MutS protein homolog 6; PD-L1, programmed death-ligand 1; PGP, P-glycoprotein; PR, progesterone receptor; PTEN, phosphatase and tensin homolog; RRM1, ribonucleotide reductase catalytic subunit M1; TLE3, transducin like enhancer of split 3; TOPO1, topoisomerase I; TOP2A, topoisomerase II alpha; TS, thymidylate synthase; TUBB3, class III beta-tubulin.

Supplemental Appendix for:  
Rare Tumor Clinic: The UCSD Moores Cancer Center Experience with a Precision Therapy Approach  
Shumei Kato et al.

**Table S3.** Matched targeted therapy and clinical outcome among patients presented in the Rare Tumor Clinic (N=21). Patient ID corresponds to **Figure 2 and Supplemental Table 1.**

| ID | Age/<br>Gender | Cancer Diagnosis*                                               | Therapy and Rationale                                                                                                                                 | Clinical outcome from matched therapy                                        |
|----|----------------|-----------------------------------------------------------------|-------------------------------------------------------------------------------------------------------------------------------------------------------|------------------------------------------------------------------------------|
| 6  | 52/W           | Castleman's Disease                                             | Siltuximab (anti-interleukin-6 antibody).<br><i>JAK1</i> mutation that alters IL-6 receptor sensitivity to IL-6 [S17]                                 | CR.<br>PFS = 11.9+ months.                                                   |
| 21 | 62/M           | Basal Cell Carcinoma, locally advanced, surgically unresectable | Vismodegib (Smoothed homologue inhibitor) for <i>PTCH1</i> mutation [S18].<br><br>Nivolumab (anti-PD1 antibody) for high tumor mutation burden [S19]. | CR.<br>PFS = 4.0+ months.                                                    |
| 25 | 62/W           | Papillary serous carcinoma of ovary                             | Doxorubicin based therapy for TOP2A positive [S9].                                                                                                    | PR (82.9% decrease).<br>PFS = 8.6+ months.                                   |
| 4  | 58/M           | Basal Cell Carcinoma, metastatic                                | Nivolumab for <i>PD-L1</i> and <i>PD-L2</i> amplification [S12, 19].                                                                                  | PR (77% decrease).<br>PFS = 12.5+ months.                                    |
| 16 | 49/W           | Neuroendocrine tumor of the uterine (high-grade)                | Nivolumab for microsatellite instability-high and high mutation burden [S19].                                                                         | PR (75% decrease).<br>PFS = 9.2+ months.                                     |
| 1  | 69 /W          | Ampullary Carcinoma                                             | Trastuzumab and pertuzumab (anti-Her2 antibodies) for <i>ERBB2</i> amplification [S20].                                                               | PR (59% decrease).<br>PFS = 15.2+ months.                                    |
| 10 | 51/W           | Erdheim Chester Disease                                         | Vemurafenib for <i>BRAF</i> V600E mutation [S21].                                                                                                     | PR (36.7% decrease).<br>PFS = 19.7 months.<br>Stopped due to severe uveitis. |

Supplemental Appendix for:  
Rare Tumor Clinic: The UCSD Moores Cancer Center Experience with a Precision Therapy Approach  
Shumei Kato et al.

|    |      |                                  |                                                                                                                                                                                                                                                                                                                                                                            |                                                                                                              |
|----|------|----------------------------------|----------------------------------------------------------------------------------------------------------------------------------------------------------------------------------------------------------------------------------------------------------------------------------------------------------------------------------------------------------------------------|--------------------------------------------------------------------------------------------------------------|
| 11 | 53/M | Erdheim Chester Disease          | Vemurafenib for <i>BRAF</i> V600E mutation [S21].                                                                                                                                                                                                                                                                                                                          | PR (32.4% decrease).<br>PFS = 26.1+ months.                                                                  |
| 8  | 36/W | Desmoid Tumor                    | Combination of sorafenib plus sulindac.<br><br>CTNNB1 (beta-catenin) is part of Wnt signaling.<br><br>In preclinical study, sorafenib was shown to have anti-cancer effect by modulating Wnt/beta-catenin signaling [S22].<br><br>Wnt/beta-catenin signaling also has cross-talk between COX-2. Thus it is potentially targetable with sulindac (COX-1/2 inhibitor) [S23]. | SD (24% decrease).<br>PFS = 9.1+ months.                                                                     |
| 35 | 59/W | High grade serous ovarian cancer | WEE1 inhibitor trial.<br><br><i>BRCA1</i> mutation is potentially targetable with WEE1 inhibitor [S24].                                                                                                                                                                                                                                                                    | SD (23% decrease).<br>PFS = 1.5+ months.                                                                     |
| 9  | 66/W | Endometrial Stroma Sarcoma       | Combination of palbociclib, lenvatinib, anastrozole and doxorubicin.<br><br>Palbociclib (CDK4/6 inhibitor) for <i>CDKN2A</i> alteration. Although some publication indicate <i>CDKN2A</i> aberration was not predictive of response to palbociclib [S25], it is                                                                                                            | SD (20.7% decrease).<br>PFS = 3.6+ months.<br>CA 125 dropped from 1040 U/ml to 19 U/ml (to reference range). |

Supplemental Appendix for:  
Rare Tumor Clinic: The UCSD Moores Cancer Center Experience with a Precision Therapy Approach  
Shumei Kato et al.

|    |      |                                  |                                                                                               |                                            |
|----|------|----------------------------------|-----------------------------------------------------------------------------------------------|--------------------------------------------|
| 31 | 58/M | Ocular melanoma                  | theoretically targetable with CDK4/6 inhibitor [S26].                                         |                                            |
|    |      |                                  | Lenvatinib (multi-kinase inhibitor including FGFR) targeting <i>FRS2</i> amplification [S27]. |                                            |
|    |      |                                  | Anastrozole (aromatase inhibitor) to target PR positive [S14].                                |                                            |
|    |      |                                  | Doxorubicin for positive TOP2A [S9].                                                          |                                            |
| 23 | 68/W | High-grade serous ovarian Cancer | Combination of nivolumab, ipilimumab and trametinib.                                          | SD (15.5% decrease).<br>PFS = 3.2+ months. |
|    |      |                                  | Nivolumab for positive PD-L1 [S12].                                                           |                                            |
|    |      |                                  | Trametinib for <i>GNAQ</i> mutation [S28].                                                    |                                            |
|    |      |                                  | Combination of carboplatin, paclitaxel and bevacizumab.                                       | SD (12.8% decrease).<br>PFS = 1.8+ months. |
|    |      |                                  | Carboplatin for <i>FANCC</i> alteration ( <i>FANCC</i> associated with BRCAness) [S29].       |                                            |
|    |      |                                  | Paclitaxel for TLE3 positive and TUBB3 negative [S3, 7].                                      |                                            |
|    |      |                                  | Bevacizumab (anti-VEGF antibody)                                                              |                                            |

Supplemental Appendix for:  
Rare Tumor Clinic: The UCSD Moores Cancer Center Experience with a Precision Therapy Approach  
Shumei Kato et al.

|    |      |                                                 |                                                                                                                                                                                                                                                                                                    |                                           |
|----|------|-------------------------------------------------|----------------------------------------------------------------------------------------------------------------------------------------------------------------------------------------------------------------------------------------------------------------------------------------------------|-------------------------------------------|
|    |      |                                                 | for <i>TP53</i> alteration. <i>TP53</i> alterations are reported to be associated with higher <i>VEGF-A</i> expression [S30]. Patients with <i>TP53</i> alteration are also reported to have better clinical outcome with anti-VEGF containing regimen [S31, 32].                                  |                                           |
| 19 | 54/W | Fallopian Cancer                                | Gemcitabine for RRM1 negative [S1].                                                                                                                                                                                                                                                                | SD (11.4% decrease).<br>PFS = 9.8 months. |
| 24 | 51/M | Adenoid Cystic Carcinoma                        | AKT inhibitor clinical trial for <i>AKT1</i> alteration.                                                                                                                                                                                                                                           | SD (8% decrease).<br>PFS = 5.5 months.    |
| 13 | 57/M | Erdheim Chester Disease                         | Vemurafenib and trametinib for <i>BRAF</i> V600E mutation [S21].                                                                                                                                                                                                                                   | SD (5% decrease).<br>PFS = 13.9+ months.  |
| 26 | 71/W | High-grade serous fallopian tube adenocarcinoma | Combination of carboplatin, bevacizumab and trametinib.                                                                                                                                                                                                                                            | SD (1.8% increase).<br>PFS = 2.4+ months. |
|    |      |                                                 | Carboplatin for ERCC1 negative [S2].                                                                                                                                                                                                                                                               |                                           |
|    |      |                                                 | Bevacizumab (anti-VEGF antibody) for <i>TP53</i> alteration. <i>TP53</i> alterations are reported to be associated with higher <i>VEGF-A</i> expression [S30]. Patients with <i>TP53</i> alteration are also reported to have better clinical outcome with anti-VEGF containing regimen [S31, 32]. |                                           |
|    |      |                                                 | Trametinib for <i>KRAS</i> amplification. <i>KRAS</i> alteration is potentially targetable with MEK inhibitor [S33].                                                                                                                                                                               |                                           |

Supplemental Appendix for:  
Rare Tumor Clinic: The UCSD Moores Cancer Center Experience with a Precision Therapy Approach  
Shumei Kato et al.

|    |      |                                     |                                                                                                                                                                                                                                                                                                                         |                                          |
|----|------|-------------------------------------|-------------------------------------------------------------------------------------------------------------------------------------------------------------------------------------------------------------------------------------------------------------------------------------------------------------------------|------------------------------------------|
| 22 | 37/W | Papillary serous carcinoma of ovary | Combination of trametinib and tamoxifen.                                                                                                                                                                                                                                                                                | SD (8.5% increase).<br>PFS = 4.2 months. |
|    |      |                                     | Trametinib for <i>KRAS</i> mutation. <i>KRAS</i> alteration is potentially targetable with MEK inhibitor [S33].                                                                                                                                                                                                         |                                          |
|    |      |                                     | Tamoxifen for ER positive [S11].                                                                                                                                                                                                                                                                                        |                                          |
| 30 | 70/M | Chondrosarcoma                      | Combination of lenvatinib, palbociclib and anastrozole.                                                                                                                                                                                                                                                                 | SD (16% increase).<br>PFS = 1.0+ month.  |
|    |      |                                     | Lenvatinib (multi-kinase inhibitor including anti-VEGF) for <i>TP53</i> mutation. <i>TP53</i> alterations are reported to be associated with higher <i>VEGF-A</i> expression [S30]. Patients with <i>TP53</i> alteration are also reported to have better clinical outcome with anti-VEGF containing regimen [S31, 32]. |                                          |
|    |      |                                     | Palbociclib (CDK4/6 inhibitor) for <i>CDKN2A/B</i> loss. Although some publication indicate <i>CDKN2A/B</i> aberration was not predictive of response to palbociclib [S25], it is theoretically targetable with CDK4/6 inhibitor [S26].                                                                                 |                                          |
|    |      |                                     | Anastrozole or PR positive [S14].                                                                                                                                                                                                                                                                                       |                                          |

Supplemental Appendix for:  
 Rare Tumor Clinic: The UCSD Moores Cancer Center Experience with a Precision Therapy Approach  
 Shumei Kato et al.

|    |      |                                  |                                                                                                                                                                                                                                                                                                                                        |                                                                |
|----|------|----------------------------------|----------------------------------------------------------------------------------------------------------------------------------------------------------------------------------------------------------------------------------------------------------------------------------------------------------------------------------------|----------------------------------------------------------------|
| 33 | 68/W | High grade serous ovarian cancer | Combination of bevacizumab and sorafenib.                                                                                                                                                                                                                                                                                              | PD.<br>PFS = 2.1 months (patient died without follow up scan). |
|    |      |                                  | Bevacizumab and sorafenib (multi-kinase inhibitor including anti-VEGF) for <i>TP53</i> mutation. <i>TP53</i> alterations are reported to be associated with higher <i>VEGF-A</i> expression [S30]. Patients with <i>TP53</i> alteration are also reported to have better clinical outcome with anti-VEGF containing regimen [S31, 32]. |                                                                |
| 20 | 73/M | Myxofibrosarcoma                 | Ceritinib for <i>IGF1R</i> amplification [S34].                                                                                                                                                                                                                                                                                        | PD with new lung metastases.<br>PFS = 1.8 months.              |

\*Patients are ordered according to the response, which corresponds to **Figure 4**.

**Abbreviations:** CR, complete response; PD, progressive disease; PFS, progression free survival; PR, partial response; SD, stable disease.

Supplemental Appendix for:  
Rare Tumor Clinic: The UCSD Moores Cancer Center Experience with a Precision Therapy Approach  
Shumei Kato et al.

**Table S4.** Genomic alterations detected by tissue next generation sequencing (n=33).

|                 | Any<br>alterations<br>N (%) | Mutation<br>N (%) | Amplification<br>N (%) | Loss<br>N (%) | Fusion/Re-<br>arrangement<br>N (%) | Multiple<br>alterations<br>N (%) |
|-----------------|-----------------------------|-------------------|------------------------|---------------|------------------------------------|----------------------------------|
| <i>TP53</i>     | 15 (45.5%)                  | 15 (45.5%)        | 0                      | 0             | 0                                  | 0                                |
| <i>CDKN2A/B</i> | 4 (12.1%)                   | 0                 | 0                      | 4 (12.1%)     | 0                                  | 0                                |
| <i>FRS2</i>     | 4 (12.1%)                   | 0                 | 4 (12.1%)              | 0             | 0                                  | 0                                |
| <i>MDM2</i>     | 4 (12.1%)                   | 0                 | 4 (12.1%)              | 0             | 0                                  | 0                                |
| <i>RB1</i>      | 4 (12.1%)                   | 4 (12.1%)         | 0                      | 0             | 0                                  | 0                                |
| <i>KRAS</i>     | 4 (12.1%)                   | 3 (9.1%)          | 1 (3.0%)               | 0             | 0                                  | 0                                |
| <i>MLL2</i>     | 3 (9.1%)                    | 3 (9.1%)          | 0                      | 0             | 0                                  | 0                                |
| <i>PIK3CA</i>   | 3 (9.1%)                    | 3 (9.1%)          | 0                      | 0             | 0                                  | 0                                |
| <i>PIK3R1</i>   | 3 (9.1%)                    | 3 (9.1%)          | 0                      | 0             | 0                                  | 0                                |
| <i>PTEN</i>     | 3 (9.1%)                    | 3 (9.1%)          | 0                      | 0             | 0                                  | 0                                |
| <i>SETD2</i>    | 3 (9.1%)                    | 3 (9.1%)          | 0                      | 0             | 0                                  | 0                                |
| <i>TERT</i>     | 3 (9.1%)                    | 3 (9.1%)          | 0                      | 0             | 0                                  | 0                                |
| <i>AKT1</i>     | 2 (6.1%)                    | 1 (3.0%)          | 1 (3.0%)               | 0             | 0                                  | 0                                |
| <i>APC</i>      | 2 (6.1%)                    | 2 (6.1%)          | 0                      | 0             | 0                                  | 0                                |
| <i>ARID1A</i>   | 2 (6.1%)                    | 2 (6.1%)          | 0                      | 0             | 0                                  | 0                                |
| <i>ASXL1</i>    | 2 (6.1%)                    | 2 (6.1%)          | 0                      | 0             | 0                                  | 0                                |
| <i>BCOR</i>     | 2 (6.1%)                    | 0                 | 0                      | 0             | 2 (6.1%)                           | 0                                |
| <i>BRCA1</i>    | 2 (6.1%)                    | 2 (6.1%)          | 0                      | 0             | 0                                  | 0                                |
| <i>CCNE1</i>    | 2 (6.1%)                    | 0                 | 2 (6.1%)               | 0             | 0                                  | 0                                |
| <i>CDK4</i>     | 2 (6.1%)                    | 1 (3.0%)          | 1 (3.0%)               | 0             | 0                                  | 0                                |
| <i>CDKN2A</i>   | 2 (6.1%)                    | 2 (6.1%)          | 0                      | 0             | 0                                  | 0                                |
| <i>EGFR</i>     | 2 (6.1%)                    | 1 (3.0%)          | 0                      | 0             | 0                                  | 1 (3.0%)                         |
| <i>EWSR1</i>    | 2 (6.1%)                    | 0                 | 0                      | 0             | 2 (6.1%)                           | 0                                |
| <i>FANCC</i>    | 2 (6.1%)                    | 2 (6.1%)          | 0                      | 0             | 0                                  | 0                                |
| <i>FAT1</i>     | 2 (6.1%)                    | 2 (6.1%)          | 0                      | 0             | 0                                  | 0                                |
| <i>FBXW7</i>    | 2 (6.1%)                    | 2 (6.1%)          | 0                      | 0             | 0                                  | 0                                |
| <i>JAK1</i>     | 2 (6.1%)                    | 2 (6.1%)          | 0                      | 0             | 0                                  | 0                                |
| <i>MYC</i>      | 2 (6.1%)                    | 2 (6.1%)          | 0                      | 0             | 0                                  | 0                                |
| <i>NOTCH1</i>   | 2 (6.1%)                    | 2 (6.1%)          | 0                      | 0             | 0                                  | 0                                |
| <i>PTCH1</i>    | 2 (6.1%)                    | 2 (6.1%)          | 0                      | 0             | 0                                  | 0                                |
| <i>SMARCA4</i>  | 2 (6.1%)                    | 2 (6.1%)          | 0                      | 0             | 0                                  | 0                                |
| <i>STK11</i>    | 2 (6.1%)                    | 2 (6.1%)          | 0                      | 0             | 0                                  | 0                                |
| <i>TERC</i>     | 2 (6.1%)                    | 2 (6.1%)          | 0                      | 0             | 0                                  | 0                                |

Included aberrant genes with N ≥ 2.

Supplemental Appendix for:

Rare Tumor Clinic: The UCSD Moores Cancer Center Experience with a Precision Therapy Approach

Shumei Kato et al.

**Table S5.** Genomic alterations detected by ctDNA (Guardant Health) (n=33).

|               | <b>Any alterations<br/>N (%)</b> | <b>Mutation<br/>N (%)</b> | <b>Amplification<br/>N (%)</b> |
|---------------|----------------------------------|---------------------------|--------------------------------|
| <i>TP53</i>   | 7 (21.2%)                        | 7 (21.2%)                 | 0                              |
| <i>BRAF</i>   | 6 (18.2%)                        | 0                         | 6 (18.2%)                      |
| <i>MYC</i>    | 5 (15.2%)                        | 0                         | 5 (15.2%)                      |
| <i>MET</i>    | 4 (12.1%)                        | 0                         | 4 (12.1%)                      |
| <i>CCNE1</i>  | 3 (9.1%)                         | 0                         | 3 (9.1%)                       |
| <i>CDK6</i>   | 3 (9.1%)                         | 0                         | 3 (9.1%)                       |
| <i>EGFR</i>   | 3 (9.1%)                         | 0                         | 3 (9.1%)                       |
| <i>PIK3CA</i> | 3 (9.1%)                         | 0                         | 3 (9.1%)                       |
| <i>ATM</i>    | 2 (6.1%)                         | 2 (6.1%)                  | 0                              |
| <i>CDK4</i>   | 2 (6.1%)                         | 1 (3.0%)                  | 1 (3.0%)                       |
| <i>ERBB2</i>  | 2 (6.1%)                         | 0                         | 2 (6.1%)                       |
| <i>KRAS</i>   | 2 (6.1%)                         | 2 (6.1%)                  | 0                              |
| <i>PTEN</i>   | 2 (6.1%)                         | 2 (6.1%)                  | 0                              |
| <i>CCND2</i>  | 1 (3.0%)                         | 0                         | 1 (3.0%)                       |
| <i>CTNNB1</i> | 1 (3.0%)                         | 1 (3.0%)                  | 0                              |
| <i>FBXW7</i>  | 1 (3.0%)                         | 1 (3.0%)                  | 0                              |
| <i>FGFR2</i>  | 1 (3.0%)                         | 0                         | 1 (3.0%)                       |
| <i>GNAQ</i>   | 1 (3.0%)                         | 1 (3.0%)                  | 0                              |
| <i>JAK2</i>   | 1 (3.0%)                         | 1 (3.0%)                  | 0                              |
| <i>KRAS</i>   | 1 (3.0%)                         | 0                         | 1 (3.0%)                       |
| <i>NRAS</i>   | 1 (3.0%)                         | 1 (3.0%)                  | 0                              |
| <i>PIK3CA</i> | 1 (3.0%)                         | 1 (3.0%)                  | 0                              |

Supplemental Appendix for:  
Rare Tumor Clinic: The UCSD Moores Cancer Center Experience with a Precision Therapy Approach  
Shumei Kato et al.

**Table S6.** Concordance between ctDNA and tissue NGS (N=27).

| <b>Genomic alteration*</b>         |                                    |                                    |              |
|------------------------------------|------------------------------------|------------------------------------|--------------|
|                                    | <b><i>TP53</i> (+) from tissue</b> | <b><i>TP53</i> (-) from tissue</b> | <b>Total</b> |
| <b><i>TP53</i> (+) from ctDNA</b>  | 4                                  | 3                                  | 7            |
| <b><i>TP53</i> (-) from ctDNA</b>  | 6                                  | 14                                 | 20           |
| <b>Total</b>                       | 10                                 | 17                                 | 27           |
| <b>Concordance for <i>TP53</i></b> | <b>18/27 (66.7%)</b>               |                                    |              |
|                                    | <b><i>BRAF</i> (+) from tissue</b> | <b><i>BRAF</i> (-) from tissue</b> | <b>Total</b> |
| <b><i>BRAF</i> (+) from ctDNA</b>  | 0                                  | 6                                  | 6            |
| <b><i>BRAF</i> (-) from ctDNA</b>  | 1                                  | 20                                 | 21           |
| <b>Total</b>                       | 1                                  | 26                                 | 27           |
| <b>Concordance for <i>BRAF</i></b> | <b>20/27 (74.1%)</b>               |                                    |              |
|                                    | <b><i>MYC</i> (+) from tissue</b>  | <b><i>MYC</i> (-) from tissue</b>  | <b>Total</b> |
| <b><i>MYC</i> (+) from ctDNA</b>   | 2                                  | 3                                  | 5            |
| <b><i>MYC</i> (-) from ctDNA</b>   | 0                                  | 22                                 | 22           |
| <b>Total</b>                       | 2                                  | 25                                 | 27           |
| <b>Concordance for <i>MYC</i></b>  | <b>24/27 (88.9%)</b>               |                                    |              |
|                                    | <b><i>MET</i> (+) from tissue</b>  | <b><i>MET</i> (-) from tissue</b>  | <b>Total</b> |
| <b><i>MET</i> (+) from ctDNA</b>   | 0                                  | 4                                  | 4            |
| <b><i>MET</i> (-) from ctDNA</b>   | 0                                  | 23                                 | 23           |
| <b>Total</b>                       | 0                                  | 27                                 | 27           |
| <b>Concordance for <i>MET</i></b>  | <b>23/27 (85.2%)</b>               |                                    |              |

\*Included 4 commonly altered genes found by ctDNA analysis.

Supplemental Appendix for:  
Rare Tumor Clinic: The UCSD Moores Cancer Center Experience with a Precision Therapy Approach  
Shumei Kato et al.

**Figure S1.** 3D waterfall plot among patients who received matched therapy in the Rare Tumor Clinic (N=21).

Patient ID corresponds to **Supplemental Tables 1 and Table 3** which describes the genomic/protein markers and matched targeted therapy patients received. See **Figure 2** for the waterfall and swimmer plot that correspond to 3D waterfall plot.

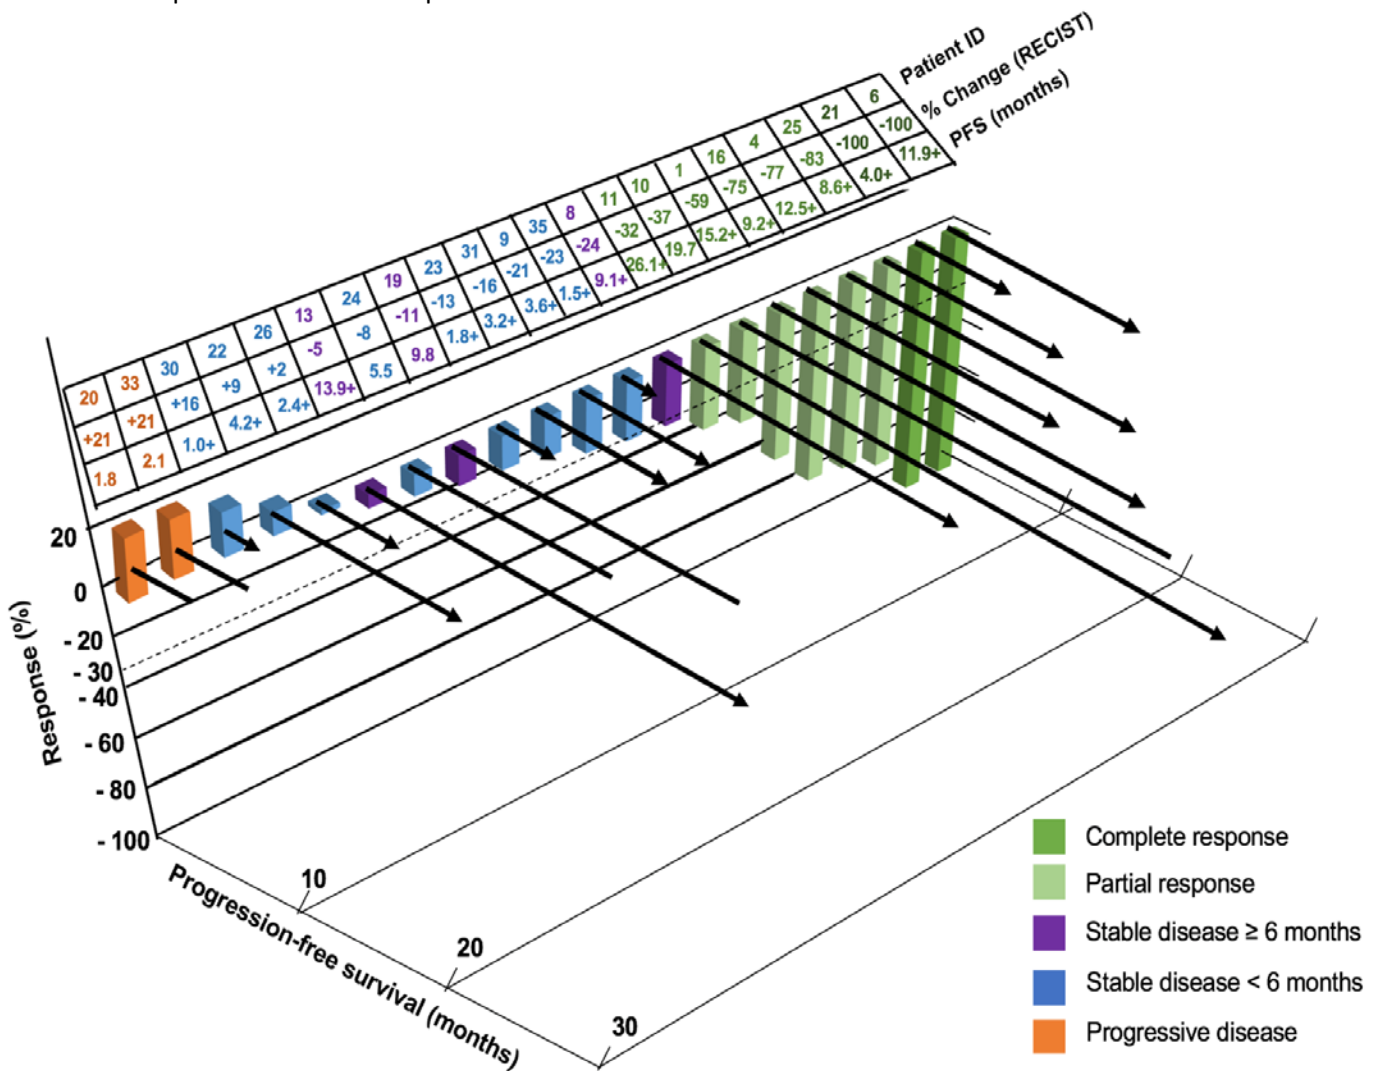

Supplemental Appendix for:  
Rare Tumor Clinic: The UCSD Moores Cancer Center Experience with a Precision Therapy Approach  
Shumei Kato et al.

**Figure S2.** Comparison of PFS between matched vs. prior unmatched therapy (N=12) PFS between matched and unmatched therapies were compared. Eight of 12 patients (66.7%) achieved PFS ratio of  $\geq 1.3$  (range: 0.23-5.60) (PFS of matched therapy divided by PFS of last prior unmatched therapy).

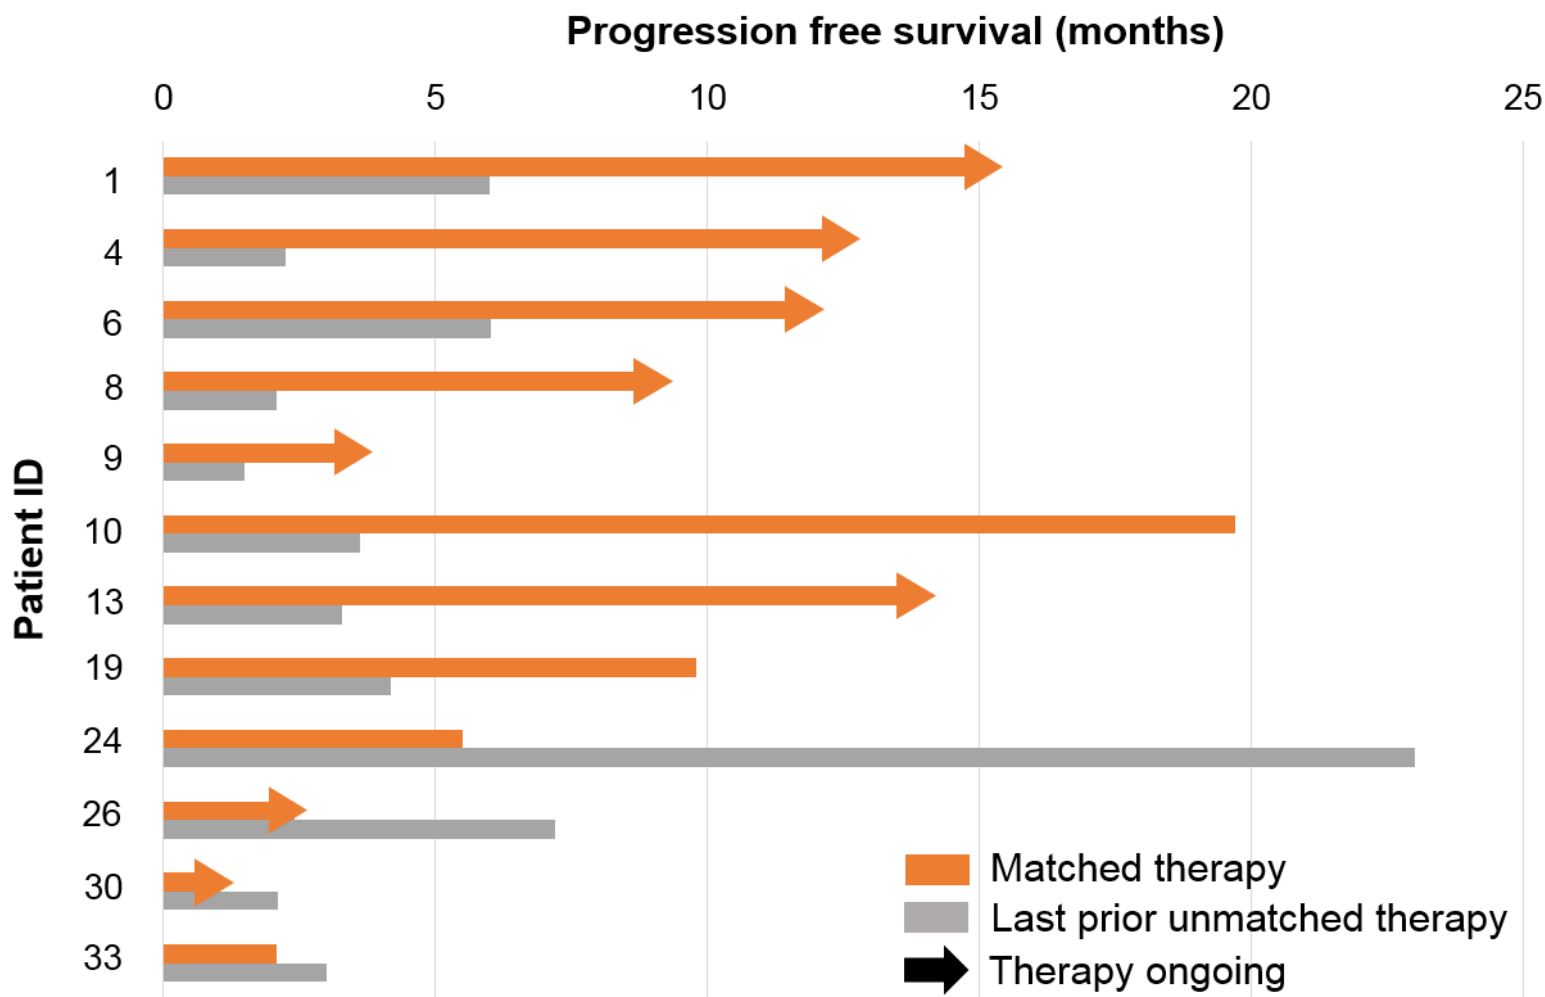

Supplemental Appendix for:

Rare Tumor Clinic: The UCSD Moores Cancer Center Experience with a Precision Therapy Approach

Shumei Kato et al.

### Supplemental References

- S1 Gong W, Zhang X, Wu J, et al. Rrm1 expression and clinical outcome of gemcitabine-containing chemotherapy for advanced non-small-cell lung cancer: A meta-analysis. *Lung Cancer* 2012;75:374-380.
- S2 Olausson KA, Dunant A, Fouret P, et al. DNA repair by ercc1 in non-small-cell lung cancer and cisplatin-based adjuvant chemotherapy. *N Engl J Med* 2006;355:983-991.
- S3 Kulkarni SA, Hicks DG, Watroba NL, et al. Tle3 as a candidate biomarker of response to taxane therapy. *Breast Cancer Res* 2009;11:R17.
- S4 Gilbert DC, Chalmers AJ, El-Khamisy SF. Topoisomerase i inhibition in colorectal cancer: Biomarkers and therapeutic targets. *Br J Cancer* 2012;106:18-24.
- S5 Vredenburg MR, Ojima I, Veith J, et al. Effects of orally active taxanes on p-glycoprotein modulation and colon and breast carcinoma drug resistance. *J Natl Cancer Inst* 2001;93:1234-1245.
- S6 Longley DB, Harkin DP, Johnston PG. 5-fluorouracil: Mechanisms of action and clinical strategies. *Nat Rev Cancer* 2003;3:330-338.
- S7 Hwang JE, Hong JY, Kim K, et al. Class iii beta-tubulin is a predictive marker for taxane-based chemotherapy in recurrent and metastatic gastric cancer. *BMC Cancer* 2013;13:431.
- S8 Licitra L, Storkel S, Kerr KM, et al. Predictive value of epidermal growth factor receptor expression for first-line chemotherapy plus cetuximab in patients with head and neck and colorectal cancer: Analysis of data from the extreme and crystal studies. *Eur J Cancer* 2013;49:1161-1168.
- S9 Burgess DJ, Doles J, Zender L, et al. Topoisomerase levels determine chemotherapy response in vitro and in vivo. *Proc Natl Acad Sci U S A* 2008;105:9053-9058.
- S10 Amatu A, Sartore-Bianchi A, Moutinho C, et al. Promoter cpg island hypermethylation of the DNA repair enzyme mgmt predicts clinical response to dacarbazine in a phase ii study for metastatic colorectal cancer. *Clin Cancer Res* 2013;19:2265-2272.
- S11 Lumachi F, Brunello A, Maruzzo M, et al. Treatment of estrogen receptor-positive breast cancer. *Curr Med Chem* 2013;20:596-604.
- S12 Patel SP and Kurzrock R. Pd-l1 expression as a predictive biomarker in cancer immunotherapy. *Mol Cancer Ther* 2015;14:847-856.
- S13 Dillon LM and Miller TW. Therapeutic targeting of cancers with loss of pten function. *Curr Drug Targets* 2014;15:65-79.
- S14 Stendahl M, Ryden L, Nordenskjold B, et al. High progesterone receptor expression correlates to the effect of adjuvant tamoxifen in premenopausal breast cancer patients. *Clin Cancer Res* 2006;12:4614-4618.
- S15 Chia K, O'Brien M, Brown M, et al. Targeting the androgen receptor in breast cancer. *Curr Oncol Rep* 2015;17:4.
- S16 Le DT, Uram JN, Wang H, et al. Pd-1 blockade in tumors with mismatch-repair deficiency. *N Engl J Med* 2015;372:2509-2520.
- S17 Patel M, Ikeda S, Pilat SR, et al. Jak1 genomic alteration associated with exceptional response to siltuximab in cutaneous castleman disease. *JAMA Dermatol* 2017
- S18 LoRusso PM, Rudin CM, Reddy JC, et al. Phase i trial of hedgehog pathway inhibitor vismodegib (gdc-0449) in patients with refractory, locally advanced or metastatic solid tumors. *Clin Cancer Res* 2011;17:2502-2511.
- S19 Topalian SL, Taube JM, Anders RA, et al. Mechanism-driven biomarkers to guide immune checkpoint blockade in cancer therapy. *Nat Rev Cancer* 2016;16:275-287.
- S20 Swain SM, Baselga J, Kim SB, et al. Pertuzumab, trastuzumab, and docetaxel in her2-positive metastatic breast cancer. *N Engl J Med* 2015;372:724-734.

Supplemental Appendix for:

Rare Tumor Clinic: The UCSD Moores Cancer Center Experience with a Precision Therapy Approach

Shumei Kato et al.

- S21 Hyman DM, Puzanov I, Subbiah V, et al. Vemurafenib in multiple nonmelanoma cancers with braf v600 mutations. *N Engl J Med* 2015;373:726-736.
- S22 Lachenmayer A, Alsinet C, Savic R, et al. Wnt-pathway activation in two molecular classes of hepatocellular carcinoma and experimental modulation by sorafenib. *Clin Cancer Res* 2012;18:4997-5007.
- S23 Kawasaki T, Noshio K, Ohnishi M, et al. Correlation of beta-catenin localization with cyclooxygenase-2 expression and cpg island methylator phenotype (cimp) in colorectal cancer. *Neoplasia* 2007;9:569-577.
- S24 Do K, Wilsker D, Ji J, et al. Phase i study of single-agent azd1775 (mk-1775), a wee1 kinase inhibitor, in patients with refractory solid tumors. *J Clin Oncol* 2015;33:3409-3415.
- S25 DeMichele A, Clark AS, Tan KS, et al. Cdk 4/6 inhibitor palbociclib (pd0332991) in rb+ advanced breast cancer: Phase ii activity, safety, and predictive biomarker assessment. *Clin Cancer Res* 2015;21:995-1001.
- S26 Sherr CJ, Beach D, Shapiro GI. Targeting cdk4 and cdk6: From discovery to therapy. *Cancer Discov* 2016;6:353-367.
- S27 Zhang K, Chu K, Wu X, et al. Amplification of frs2 and activation of fgfr/frs2 signaling pathway in high-grade liposarcoma. *Cancer Res* 2013;73:1298-1307.
- S28 Falchook GS, Lewis KD, Infante JR, et al. Activity of the oral mek inhibitor trametinib in patients with advanced melanoma: A phase 1 dose-escalation trial. *Lancet Oncol* 2012;13:782-789.
- S29 Rigakos G and Razis E. Bcraness: Finding the achilles heel in ovarian cancer. *Oncologist* 2012;17:956-962.
- S30 Schwaederle M, Lazar V, Validire P, et al. Vegf-a expression correlates with tp53 mutations in non-small cell lung cancer: Implications for antiangiogenesis therapy. *Cancer Res* 2015;75:1187-1190.
- S31 Said R, Hong DS, Warneke CL, et al. P53 mutations in advanced cancers: Clinical characteristics, outcomes, and correlation between progression-free survival and bevacizumab-containing therapy. *Oncotarget* 2013;4:705-714.
- S32 Wheler JJ, Janku F, Naing A, et al. Tp53 alterations correlate with response to vegf/vegfr inhibitors: Implications for targeted therapeutics. *Mol Cancer Ther* 2016;15:2475-2485.
- S33 Cox AD, Fesik SW, Kimmelman AC, et al. Drugging the undruggable ras: Mission possible? *Nat Rev Drug Discov* 2014;13:828-851.
- S34 Awad MM and Shaw AT. Alk inhibitors in non-small cell lung cancer: Crizotinib and beyond. *Clin Adv Hematol Oncol* 2014;12:429-439.
